# Supplementary material for: Pygopus-2 promotes invasion and metastasis of hepatic carcinoma cell by decreasing E-cadherin expression
Source: PubMed Central journal article supplement (PMC4484440; doi:10.18632/oncotarget.3570), 2015-03-14
Supplement: oncotarget-06-11074-s001.pdf [file oncotarget-06-11074-s001.pdf]

## Pygo2 promotes invasion and metastasis of hepatic carcinoma cell by decreasing E-cadherin expression

### Supplementary Material

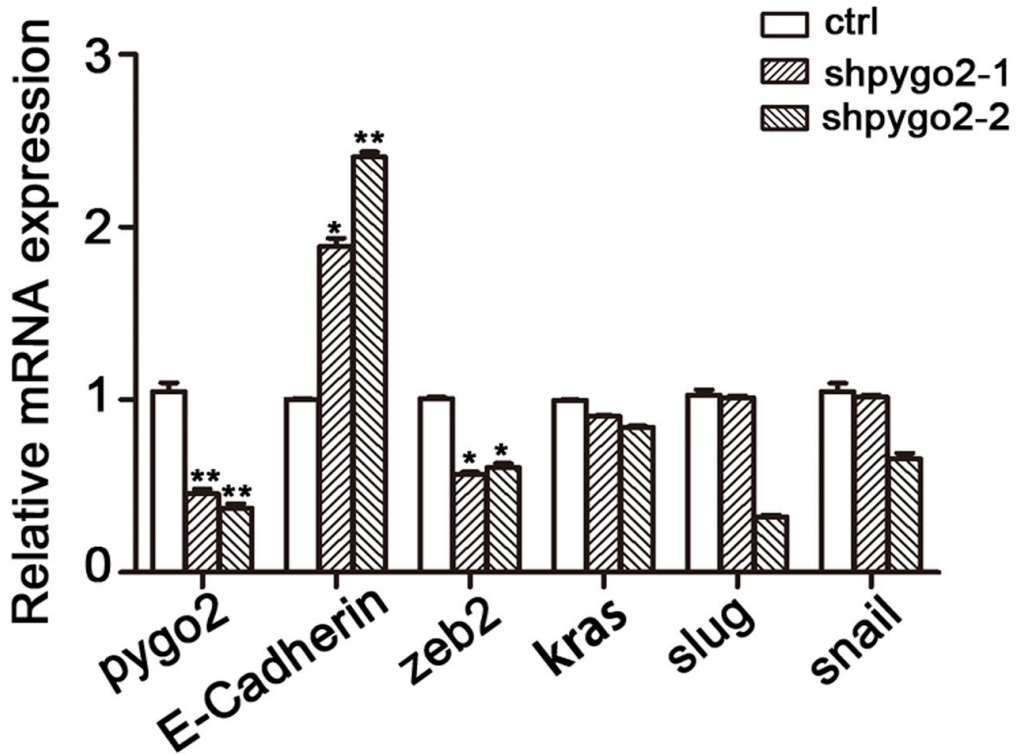

**Figure S1: The effect of Pygo2 on the inhibitor of E-cadherin.** Among the known inhibitor (zeb2, kras, slug and snail), only zeb2 mRNA levels showed altered expression both in 97H-shPygo2-1 and 97H-shPygo2-2 cells compared with control group. \* $P \leq 0.05$ , \*\* $P \leq 0.01$ .

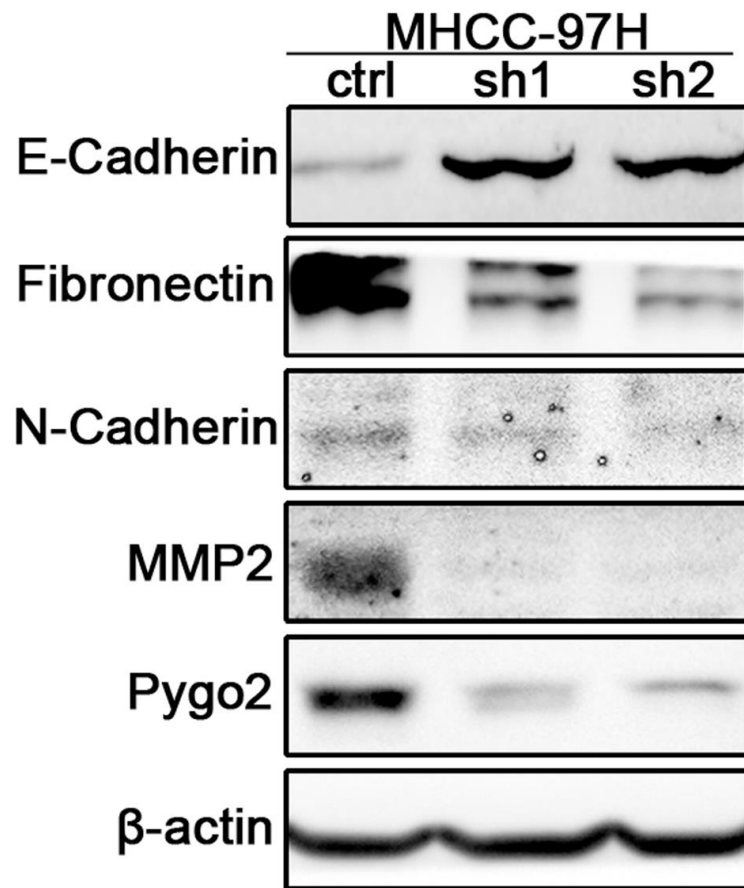

**Figure S2: The effect of Pygo2 on EMT markers.** The proteins level of N-cadherin, Fibronectin and MMP-2 were decreased when Pygo2 was down-regulated in 97H-ShPygo2.
